# Supplementary material for: Novel model peptide for Atx1-like metallochaperones
Source: Royal Society of Chemistry journal article supplement (doi:10.1039/b315489k), 2004-01-01
Supplement: b315489k.pdf [file b315489k.pdf]

## Novel model peptide for Atx1-like metallochaperones

O. Sénèque,<sup>a</sup> S. Crouzy,<sup>b</sup> D. Boturyn,<sup>c</sup> P. Dumy,<sup>c</sup> M. Ferrand,<sup>b</sup> P. Delangle.\*<sup>a</sup>

<sup>a</sup> Laboratoire de Reconnaissance Ionique, SCIB (FRE 2600), CEA/DSM/DRFMC, CEA-Grenoble, 17 rue des Martyrs, 38054 Grenoble Cedex 9, France. Fax: (+33) 4 38 78 50 90; Tel: (+33) 4 38 78 98 22; E-mail: delangle@cea.fr

<sup>b</sup> Laboratoire de Biophysique Moléculaire et Cellulaire (UMR 5090), CEA/DSV/DRDC, CEA-Grenoble, 17 rue des Martyrs, 38054 Grenoble Cedex 9, France.

<sup>c</sup> Laboratoire d'Etudes Dynamiques et Structurales de la Sélectivité (UMR 5616), Université Joseph Fourier, 301 rue de la Chimie, 38041 Grenoble Cedex 9, France.

### Supplementary Information

**Table S1** <sup>1</sup>H NMR (500 MHz) chemical shifts (δ ppm) for **1**·H<sub>2</sub> in H<sub>2</sub>O/D<sub>2</sub>O 9:1 at 298K.

| Residue | HN   | Hα                                              | Hβ                                              | Others                                                                                                                                  |
|---------|------|-------------------------------------------------|-------------------------------------------------|-----------------------------------------------------------------------------------------------------------------------------------------|
| GLY 1   | 8.66 | 3.66 ( <i>pro-R</i> ),<br>4.08 ( <i>pro-S</i> ) |                                                 |                                                                                                                                         |
| MET 2   | 7.91 | 4.64                                            | 1.91, 2.07                                      | CH <sub>2</sub> (γ): 2.35, 2.44; CH <sub>3</sub> (ε): 2.00                                                                              |
| THR 3   | 8.31 | 4.37                                            | 4.18                                            | CH <sub>3</sub> (γ): 1.10                                                                                                               |
| CYS 4   | 8.18 | 4.53                                            | 2.93                                            |                                                                                                                                         |
| SER 5   | 8.44 | 4.33                                            | 3.81                                            |                                                                                                                                         |
| GLY 6   | 8.52 | 3.77, 4.00                                      |                                                 |                                                                                                                                         |
| CYS 7   | 7.90 | 4.50                                            | 2.86                                            |                                                                                                                                         |
| SER 8   | 8.48 | 4.42                                            | 3.80                                            |                                                                                                                                         |
| ARG 9   | 7.82 | 4.61                                            | 1.62, 1.76                                      | CH <sub>2</sub> (γ): 1.58; CH <sub>2</sub> (δ): 3.12; HN(ε): 7.08                                                                       |
| PRO 10  | -    | 4.25                                            | 2.21 ( <i>pro-S</i> ),<br>1.80 ( <i>pro-R</i> ) | CH <sub>2</sub> (γ): 1.91 ( <i>pro-R</i> ), 2.09 ( <i>pro-S</i> );<br>CH <sub>2</sub> (δ): 3.52 ( <i>pro-S</i> ), 3.76 ( <i>pro-R</i> ) |

**Table S2** <sup>3</sup>J<sub>HN,Hα</sub> coupling constants (Hz) for **1**·H<sub>2</sub> in H<sub>2</sub>O/D<sub>2</sub>O 9:1 at 298K.

| MET 2 | THR 3 | CYS 4 | SER 5 | CYS 7 | SER 8 | ARG 9 |
|-------|-------|-------|-------|-------|-------|-------|
| 8.0   | 8.0   | 6.7   | 6.0   | 7.4   | 7.2   | 7.5   |

**Table S3** ROESY-derived distances (Å) for **1**·H<sub>2</sub> in H<sub>2</sub>O/D<sub>2</sub>O 9:1 at 298K.  $d(\text{H1},\text{H2})_{\text{min}}$  and  $d(\text{H1},\text{H2})_{\text{max}}$  are the lower and upper distance limits, respectively, used for X-PLOR calculations.

| H1         | H2         | $d(\text{H1},\text{H2})$ | $d(\text{H1},\text{H2})_{\text{min}}$ | $d(\text{H1},\text{H2})_{\text{max}}$ |
|------------|------------|--------------------------|---------------------------------------|---------------------------------------|
| GLY 1 HN   | GLY 1 HA2  | 2.35                     | 2.11                                  | 2.58                                  |
| GLY 1 HN   | GLY 1 HA1  | 2.78                     | 2.50                                  | 3.06                                  |
| GLY 1 HN   | PRO 10 HA  | 2.11                     | 1.90                                  | 2.32                                  |
| GLY 1 HN   | PRO 10 HB2 | 3.55                     | 3.20                                  | 3.91                                  |
| GLY 1 HN   | PRO 10 HB1 | 3.70                     | 3.33                                  | 4.07                                  |
| GLY 1 HN   | MET 2 HN   | 2.69                     | 2.42                                  | 2.96                                  |
| MET 2 HN   | MET 2 HA   | 2.50                     | 2.25                                  | 2.75                                  |
| MET 2 HN   | GLY 1 HA1  | 3.26                     | 2.93                                  | 3.58                                  |
| MET 2 HN   | GLY 1 HA2  | 3.19                     | 2.87                                  | 3.51                                  |
| MET 2 HN   | PRO 10 HA  | 3.60                     | 3.24                                  | 3.95                                  |
| MET 2 HN   | MET 2 HG*  | 3.17                     | 2.85                                  | 4.19                                  |
| MET 2 HN   | MET 2 HB*  | 2.82                     | 2.53                                  | 3.80                                  |
| THR 3 HN   | MET 2 HN   | 2.81                     | 2.53                                  | 3.09                                  |
| THR 3 HN   | THR 3 HA   | 2.64                     | 2.37                                  | 2.90                                  |
| THR 3 HN   | MET 2 HB*  | 3.18                     | 2.86                                  | 4.20                                  |
| THR 3 HN   | THR 3 HG2* | 3.48                     | 3.13                                  | 4.23                                  |
| THR 3 HG2* | THR 3 HB   | 2.52                     | 2.27                                  | 3.17                                  |
| THR 3 HG2* | THR 3 HA   | 2.75                     | 2.47                                  | 3.42                                  |
| THR 3 HN   | CYS 4 HN   | 3.07                     | 2.76                                  | 3.37                                  |
| CYS 4 HN   | CYS 4 HA   | 2.67                     | 2.40                                  | 2.94                                  |
| CYS 4 HN   | THR 3 HA   | 2.34                     | 2.10                                  | 2.57                                  |

|            |            |      |      |      |
|------------|------------|------|------|------|
| CYS 4 HN   | THR 3 HB   | 3.15 | 2.84 | 3.47 |
| CYS 4 HN   | CYS 4 HB*  | 2.93 | 2.64 | 3.92 |
| CYS 4 HN   | MET 2 HB*  | 3.92 | 3.53 | 5.02 |
| CYS 4 HN   | THR 3 HG2* | 3.95 | 3.56 | 4.75 |
| CYS 4 HA   | CYS 4 HB*  | 2.48 | 2.24 | 3.43 |
| SER 5 HN   | CYS 4 HA   | 2.32 | 2.09 | 2.56 |
| SER 5 HN   | SER 5 HA   | 2.66 | 2.39 | 2.92 |
| SER 5 HN   | SER 5 HB*  | 2.74 | 2.46 | 3.71 |
| SER 5 HN   | CYS 4 HB*  | 3.06 | 2.75 | 4.06 |
| SER 5 HA   | SER 5 HB*  | 2.51 | 2.26 | 3.46 |
| GLY 6 HN   | CYS 7 HN   | 2.71 | 2.44 | 2.98 |
| GLY 6 HN   | SER 5 HA   | 2.31 | 2.08 | 2.54 |
| GLY 6 HN   | GLY 6 HA*  | 2.48 | 2.23 | 3.43 |
| CYS 7 HN   | GLY 6 HA*  | 2.89 | 2.60 | 3.88 |
| CYS 7 HN   | CYS 7 HA   | 2.74 | 2.47 | 3.02 |
| CYS 7 HN   | CYS 7 HB*  | 1.94 | 1.74 | 2.83 |
| CYS 7 HA   | CYS 7 HB*  | 2.45 | 2.20 | 3.39 |
| SER 8 HN   | ARG 9 HN   | 2.76 | 2.49 | 3.04 |
| SER 8 HN   | CYS 7 HA   | 2.26 | 2.04 | 2.49 |
| SER 8 HN   | SER 8 HB*  | 2.75 | 2.47 | 3.72 |
| SER 8 HN   | CYS 7 HB*  | 3.35 | 3.01 | 4.38 |
| SER 8 HA   | SER 8 HB*  | 2.42 | 2.18 | 3.37 |
| ARG 9 HN   | ARG 9 HA   | 2.77 | 2.49 | 3.04 |
| ARG 9 HN   | SER 8 HA   | 2.42 | 2.18 | 2.66 |
| ARG 9 HN   | CYS 7 HB*  | 4.08 | 3.67 | 5.19 |
| ARG 9 HN   | SER 8 HB*  | 3.54 | 3.18 | 4.59 |
| ARG 9 HA   | PRO 10 HD1 | 2.04 | 1.84 | 2.25 |
| ARG 9 HA   | PRO 10 HD2 | 2.43 | 2.18 | 2.67 |
| ARG 9 HE   | ARG 9 HD*  | 2.77 | 2.49 | 3.74 |
| ARG 9 HE   | ARG 9 HG*  | 3.00 | 2.70 | 4.00 |
| PRO 10 HB1 | PRO 10 HA  | 2.30 | 2.07 | 2.53 |
| PRO 10 HA  | PRO 10 HB2 | 2.82 | 2.54 | 3.10 |
| CYS 4 HN   | THR 3 HA   | 2.34 | 2.10 | 2.57 |
| CYS 7 HB*  | MET 2 HB*  | 3.66 | 3.29 | 5.03 |
| CYS 7 HN   | SER 5 HA   | 3.82 | 3.44 | 4.20 |
| ARG 9 HG*  | MET 2 HB*  | 2.57 | 2.31 | 3.83 |
| CYS 7 HB*  | ARG 9 HG*  | 4.38 | 3.95 | 5.82 |
| ARG 9 HN   | MET 2 HB*  | 3.66 | 3.29 | 4.72 |

**Table S4**  $^1\text{H}$  NMR (500 MHz) chemical shifts ( $\delta$  ppm) for **1**-Hg in  $\text{H}_2\text{O}/\text{D}_2\text{O}$  9:1 at 298K.

| Residue | HN   | H $\alpha$                                      | H $\beta$                                       | Others                                                                                                                                                    |
|---------|------|-------------------------------------------------|-------------------------------------------------|-----------------------------------------------------------------------------------------------------------------------------------------------------------|
| GLY 1   | 8.69 | 3.70 ( <i>pro-R</i> ),<br>4.10 ( <i>pro-S</i> ) |                                                 |                                                                                                                                                           |
| MET 2   | 8.09 | 4.58                                            | 1.78, 2.06                                      | CH <sub>2</sub> ( $\gamma$ ): 2.29, 2.37; CH <sub>3</sub> ( $\epsilon$ ): 2.01                                                                            |
| THR 3   | 7.93 | 4.09                                            | 4.06                                            | CH <sub>3</sub> ( $\gamma$ ): 1.18                                                                                                                        |
| CYS 4   | 8.56 | 4.96                                            | 3.54                                            |                                                                                                                                                           |
| SER 5   | 8.88 | 4.29                                            | 3.89                                            |                                                                                                                                                           |
| GLY 6   | 8.63 | 3.78, 4.19                                      |                                                 |                                                                                                                                                           |
| CYS 7   | 7.59 | 4.98                                            | 3.32, 3.47                                      |                                                                                                                                                           |
| SER 8   | 8.48 | 4.42                                            | 3.81, 3.88                                      |                                                                                                                                                           |
| ARG 9   | 7.34 | 4.50                                            | 1.66, 1.76                                      | CH <sub>2</sub> ( $\gamma$ ): 1.59; CH <sub>2</sub> ( $\delta$ ): 3.18; HN( $\epsilon$ ): 7.06                                                            |
| PRO 10  | -    | 4.25                                            | 2.22 ( <i>pro-S</i> ),<br>1.85 ( <i>pro-R</i> ) | CH <sub>2</sub> ( $\gamma$ ): 1.94 ( <i>pro-R</i> ), 2.03 ( <i>pro-S</i> );<br>CH <sub>2</sub> ( $\delta$ ): 3.54 ( <i>pro-S</i> ), 3.89 ( <i>pro-R</i> ) |

**Table S5**  $^3J_{\text{HN,H}\alpha}$  coupling constants (Hz) for **1**-Hg in  $\text{H}_2\text{O}/\text{D}_2\text{O}$  9:1 at 298K.

| MET 2 | THR 3 | CYS 4 | SER 5 | CYS 7 | SER 8 | ARG 9 |
|-------|-------|-------|-------|-------|-------|-------|
| 8.9   | 4.9   | 6.0   | 4.7   | 5.2   | 8.9   | 7.0   |

**Table S6** ROESY-derived distances (Å) and distances calculated using X-PLOR for 1-Hg in H<sub>2</sub>O/D<sub>2</sub>O 9:1 at 298K.  $d(\text{H1},\text{H2})_{\text{min}}$  and  $d(\text{H1},\text{H2})_{\text{max}}$  are the lower and upper distance limits used for X-PLOR calculations. The calculated distances are those of the lowest energy structure.

| H1       | H2         | $d(\text{H1},\text{H2})$ | $d(\text{H1},\text{H2})_{\text{min}}$ | $d(\text{H1},\text{H2})_{\text{max}}$ | Calculated |
|----------|------------|--------------------------|---------------------------------------|---------------------------------------|------------|
| GLY 1 HN | MET 2 HN   | 2.78                     | 2.50                                  | 3.05                                  | 2.86       |
| GLY 1 HN | THR 3 HN   | 3.77                     | 3.39                                  | 4.15                                  | 3.34       |
| GLY 1 HN | PRO 10 HA  | 2.12                     | 1.91                                  | 2.33                                  | 2.19       |
| GLY 1 HN | GLY 1 HA1  | 2.74                     | 2.46                                  | 3.01                                  | 2.98       |
| GLY 1 HN | GLY 1 HA2  | 2.30                     | 2.07                                  | 2.53                                  | 2.44       |
| GLY 1 HN | PRO 10 HB1 | 3.83                     | 3.45                                  | 4.21                                  | 3.95       |
| GLY 1 HN | PRO 10 HB2 | 3.42                     | 3.08                                  | 3.77                                  | 3.51       |
| GLY 1 HN | THR 3 HG2* | 5.11                     | 4.60                                  | 6.02                                  | 6.02       |
| MET 2 HN | THR 3 HN   | 2.46                     | 2.21                                  | 2.71                                  | 2.68       |
| MET 2 HN | MET 2 HA   | 2.88                     | 2.59                                  | 3.17                                  | 2.99       |
| MET 2 HN | PRO 10 HA  | 3.55                     | 3.20                                  | 3.91                                  | 3.69       |
| MET 2 HN | GLY 1 HA1  | 2.93                     | 2.63                                  | 3.22                                  | 2.92       |
| MET 2 HN | GLY 1 HA2  | 3.14                     | 2.82                                  | 3.45                                  | 3.52       |
| MET 2 HN | MET 2 HG*  | 3.01                     | 2.71                                  | 4.01                                  | 3.99       |
| MET 2 HN | MET 2 HB*  | 2.87                     | 2.59                                  | 3.86                                  | 3.11       |
| MET 2 HN | THR 3 HG2* | 5.25                     | 4.73                                  | 6.18                                  | 6.21       |
| MET 2 HA | MET 2 HG*  | 3.02                     | 2.71                                  | 4.02                                  | 2.91       |
| MET 2 HA | MET 2 HB*  | 2.72                     | 2.45                                  | 3.70                                  | 2.84       |
| THR 3 HN | CYS 4 HN   | 3.23                     | 2.90                                  | 3.55                                  | 4.03       |
| THR 3 HN | ARG 9 HN   | 4.41                     | 3.97                                  | 4.86                                  | 5.04       |
| THR 3 HN | MET 2 HA   | 2.69                     | 2.42                                  | 2.96                                  | 2.82       |
| THR 3 HN | PRO 10 HA  | 4.00                     | 3.60                                  | 4.40                                  | 4.27       |
| THR 3 HN | THR 3 HA   | 2.65                     | 2.38                                  | 2.91                                  | 2.85       |
| THR 3 HN | THR 3 HB   | 2.69                     | 2.42                                  | 2.96                                  | 2.85       |
| THR 3 HN | MET 2 HB*  | 3.41                     | 3.07                                  | 4.45                                  | 4.33       |
| THR 3 HN | THR 3 HG2* | 3.50                     | 3.15                                  | 4.26                                  | 4.46       |
| THR 3 HA | THR 3 HG2* | 2.82                     | 2.54                                  | 3.51                                  | 2.84       |
| CYS 4 HN | CYS 7 HN   | 3.05                     | 2.75                                  | 3.36                                  | 3.44       |
| CYS 4 HN | CYS 4 HA   | 2.86                     | 2.57                                  | 3.14                                  | 2.97       |
| CYS 4 HN | THR 3 HA   | 2.25                     | 2.03                                  | 2.48                                  | 2.09       |
| CYS 4 HN | THR 3 HB   | 3.50                     | 3.20                                  | 3.80                                  | 4.15       |
| CYS 4 HN | CYS 4 HB*  | 3.55                     | 3.20                                  | 4.61                                  | 3.42       |
| CYS 4 HN | MET 2 HB*  | 3.89                     | 3.50                                  | 4.98                                  | 5.12       |
| CYS 4 HN | THR 3 HG2* | 3.43                     | 3.09                                  | 4.18                                  | 4.27       |
| CYS 4 HA | CYS 4 HB*  | 2.58                     | 2.32                                  | 3.54                                  | 2.47       |
| CYS 4 HA | THR 3 HG2* | 4.24                     | 3.81                                  | 5.06                                  | 5.34       |
| SER 5 HN | GLY 6 HN   | 3.15                     | 2.84                                  | 3.47                                  | 2.81       |
| SER 5 HN | CYS 4 HN   | 4.46                     | 4.02                                  | 4.91                                  | 4.44       |
| SER 5 HN | CYS 4 HA   | 2.43                     | 2.18                                  | 2.67                                  | 2.77       |
| SER 5 HN | SER 5 HA   | 2.76                     | 2.48                                  | 3.03                                  | 2.92       |
| SER 5 HN | SER 5 HB*  | 2.70                     | 2.43                                  | 3.67                                  | 2.63       |
| SER 5 HN | CYS 4 HB*  | 2.63                     | 2.37                                  | 3.60                                  | 3.09       |
| SER 5 HA | SER 5 HB*  | 2.42                     | 2.18                                  | 3.36                                  | 2.84       |
| GLY 6 HN | CYS 7 HN   | 2.56                     | 2.31                                  | 2.82                                  | 2.13       |
| GLY 6 HN | CYS 4 HA   | 3.96                     | 3.57                                  | 4.36                                  | 4.29       |
| GLY 6 HN | SER 5 HA   | 2.78                     | 2.50                                  | 3.06                                  | 3.16       |
| GLY 6 HN | GLY 6 HA*  | 2.49                     | 2.24                                  | 3.44                                  | 2.72       |
| GLY 6 HN | SER 5 HB*  | 3.32                     | 2.98                                  | 4.35                                  | 4.05       |
| GLY 6 HN | CYS 4 HB*  | 4.44                     | 4.00                                  | 5.58                                  | 4.13       |
| CYS 7 HN | SER 8 HN   | 3.61                     | 3.25                                  | 3.97                                  | 4.32       |
| CYS 7 HN | CYS 7 HA   | 2.71                     | 2.44                                  | 2.98                                  | 2.92       |
| CYS 7 HN | SER 5 HA   | 3.56                     | 3.21                                  | 3.92                                  | 4.05       |
| CYS 7 HN | GLY 6 HA*  | 3.17                     | 2.85                                  | 4.18                                  | 3.34       |
| CYS 7 HN | CYS 7 HB1  | 3.18                     | 2.86                                  | 3.49                                  | 3.27       |
| CYS 7 HN | CYS 7 HB2  | 3.57                     | 3.21                                  | 3.93                                  | 3.99       |
| CYS 7 HN | CYS 4 HB*  | 5.16                     | 4.64                                  | 6.38                                  | 5.26       |

|           |            |      |      |      |      |
|-----------|------------|------|------|------|------|
| CYS 7 HA  | CYS 7 HB1  | 2.37 | 2.14 | 2.61 | 2.56 |
| CYS 7 HA  | CYS 7 HB2  | 2.56 | 2.31 | 2.82 | 2.40 |
| CYS 7 HB2 | ARG 9 HG*  | 3.51 | 3.16 | 4.56 | 4.06 |
| SER 8 HN  | ARG 9 HN   | 2.69 | 2.42 | 2.96 | 2.84 |
| SER 8 HN  | CYS 7 HA   | 2.28 | 2.05 | 2.51 | 2.55 |
| SER 8 HN  | SER 8 HB*  | 2.92 | 2.62 | 3.91 | 3.29 |
| SER 8 HN  | CYS 7 HB1  | 3.73 | 3.36 | 4.11 | 3.68 |
| SER 8 HN  | CYS 7 HB2  | 2.51 | 2.25 | 2.76 | 2.23 |
| SER 8 HN  | ARG 9 HG*  | 4.09 | 3.68 | 5.20 | 4.21 |
| ARG 9 HN  | ARG 9 HA   | 2.71 | 2.44 | 2.98 | 2.99 |
| ARG 9 HN  | THR 3 HA   | 3.43 | 3.09 | 3.78 | 3.08 |
| ARG 9 HN  | SER 8 HB*  | 4.18 | 3.76 | 5.30 | 4.43 |
| ARG 9 HN  | CYS 7 HB1  | 4.15 | 3.73 | 4.56 | 4.65 |
| ARG 9 HN  | CYS 7 HB2  | 3.25 | 2.93 | 3.58 | 3.53 |
| ARG 9 HN  | THR 3 HG2* | 4.84 | 4.36 | 5.73 | 4.55 |
| ARG 9 HN  | ARG 9 HG*  | 2.85 | 2.57 | 3.84 | 3.72 |
| ARG 9 HN  | ARG 9 HB*  | 2.75 | 2.47 | 3.72 | 2.89 |
| ARG 9 HA  | PRO 10HD1  | 2.10 | 1.89 | 2.31 | 2.31 |
| ARG 9 HA  | PRO 10 HD2 | 2.50 | 2.25 | 2.75 | 2.66 |
| ARG 9 HA  | ARG 9 HD*  | 2.80 | 2.52 | 3.78 | 3.88 |
| ARG 9 HA  | ARG 9 HG*  | 2.67 | 2.41 | 3.64 | 2.61 |
| ARG 9 HA  | ARG 9 HB*  | 2.66 | 2.39 | 3.62 | 2.84 |
| CYS 7 HN  | THR 3 HA   | 4.59 | 4.13 | 5.05 | 4.76 |

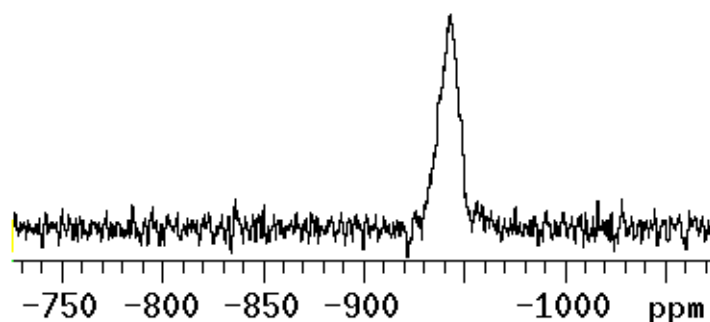

**Figure S1**  $^{199}\text{Hg}$  NMR spectrum of  $1\cdot\text{Hg}$  in  $\text{H}_2\text{O}/\text{D}_2\text{O}$  9:1 at 298K. The spectrum was recorded on a Varian Mercury Spectrometer at 71.6 MHz. The sample ( $1\cdot\text{Hg}$ , 3 mM in  $\text{H}_2\text{O}/\text{D}_2\text{O}$  9:1, pH 4.0) was prepared with 91% enriched  $^{199}\text{Hg}^{2+}$ . The spectrum was collected with  $10^6$  scans. A 50 Hz line broadening was applied during the processing ( $S/N = 16$ ,  $\Delta\nu_{1/2} = 780$  Hz). Chemical shifts are referenced to  $\text{Hg}(\text{CH}_3)_2$  (0 ppm).
